# Supplementary material for: Determination of Methyl Methanesulfonate and Ethyl Methylsulfonate in New Drug for the Treatment of Fatty Liver Using Derivatization Followed by High-Performance Liquid Chromatography with Ultraviolet Detection
Source: MDPI journal article supplement (doi:10.3390/molecules27061950), 2022-03-17
Supplement: s1 [file s1]

## Supporting information

### **Determination of Methyl Methanesulfonate and Ethyl Methylsulfonate in New Drug for the Treatment of Fatty Liver Using Derivatization Followed by High-Performance Liquid Chromatography with Ultraviolet Detection**

#### **Table of Contents**

|                                                                                                      |    |
|------------------------------------------------------------------------------------------------------|----|
| <b>Figure S1.</b> HPLC chromatograms of different derivatization solvents.....                       | S1 |
| <b>Figure S2.</b> HPLC chromatograms of temperatures and times of derivatization reaction...         | S2 |
| <b>Figure S3.</b> HPLC chromatograms of concentrations of derivatization reagent added.....          | S3 |
| <b>Figure S4.</b> HPLC chromatograms of concentrations of NaOH added.....                            | S4 |
| <b>Figure S5.</b> HPLC chromatograms of concentrations of Na <sub>2</sub> CO <sub>3</sub> added..... | S5 |
| <b>Figure S6.</b> HPLC chromatograms of amount of Et <sub>3</sub> N added.....                       | S6 |
| <b>Figure S7.</b> HPLC chromatograms of types of base.....                                           | S6 |
| <b>Figure S8.</b> HPLC chromatograms of samples.....                                                 | S7 |
| <b>Figure S9.</b> GC-MS chromatograms of samples.....                                                | S7 |

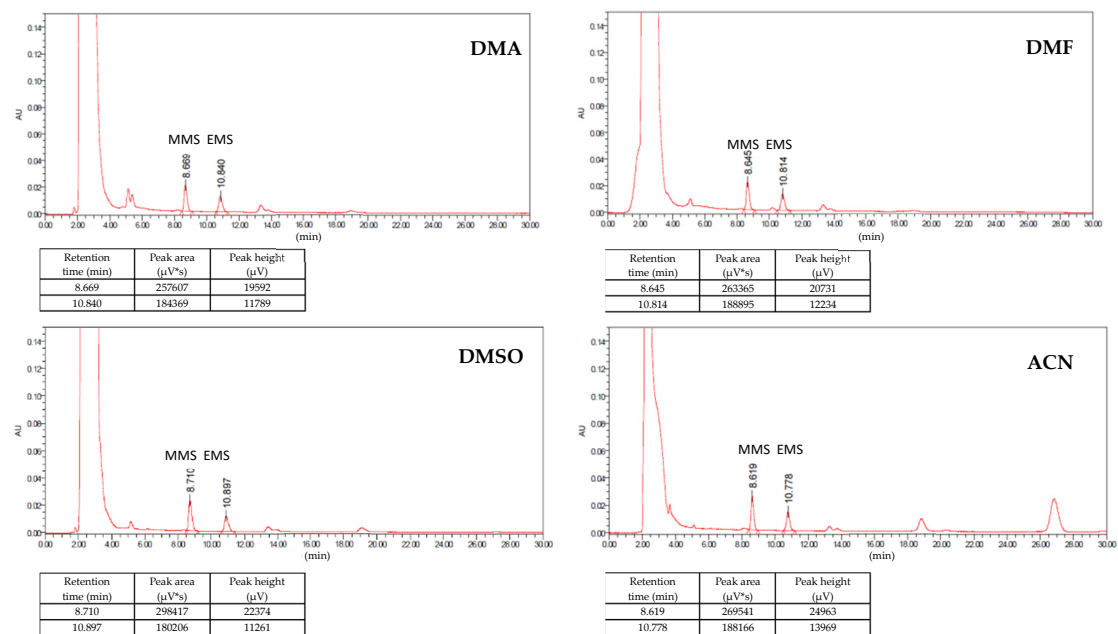

**Figure S1.** HPLC chromatograms of different derivatization solvents.

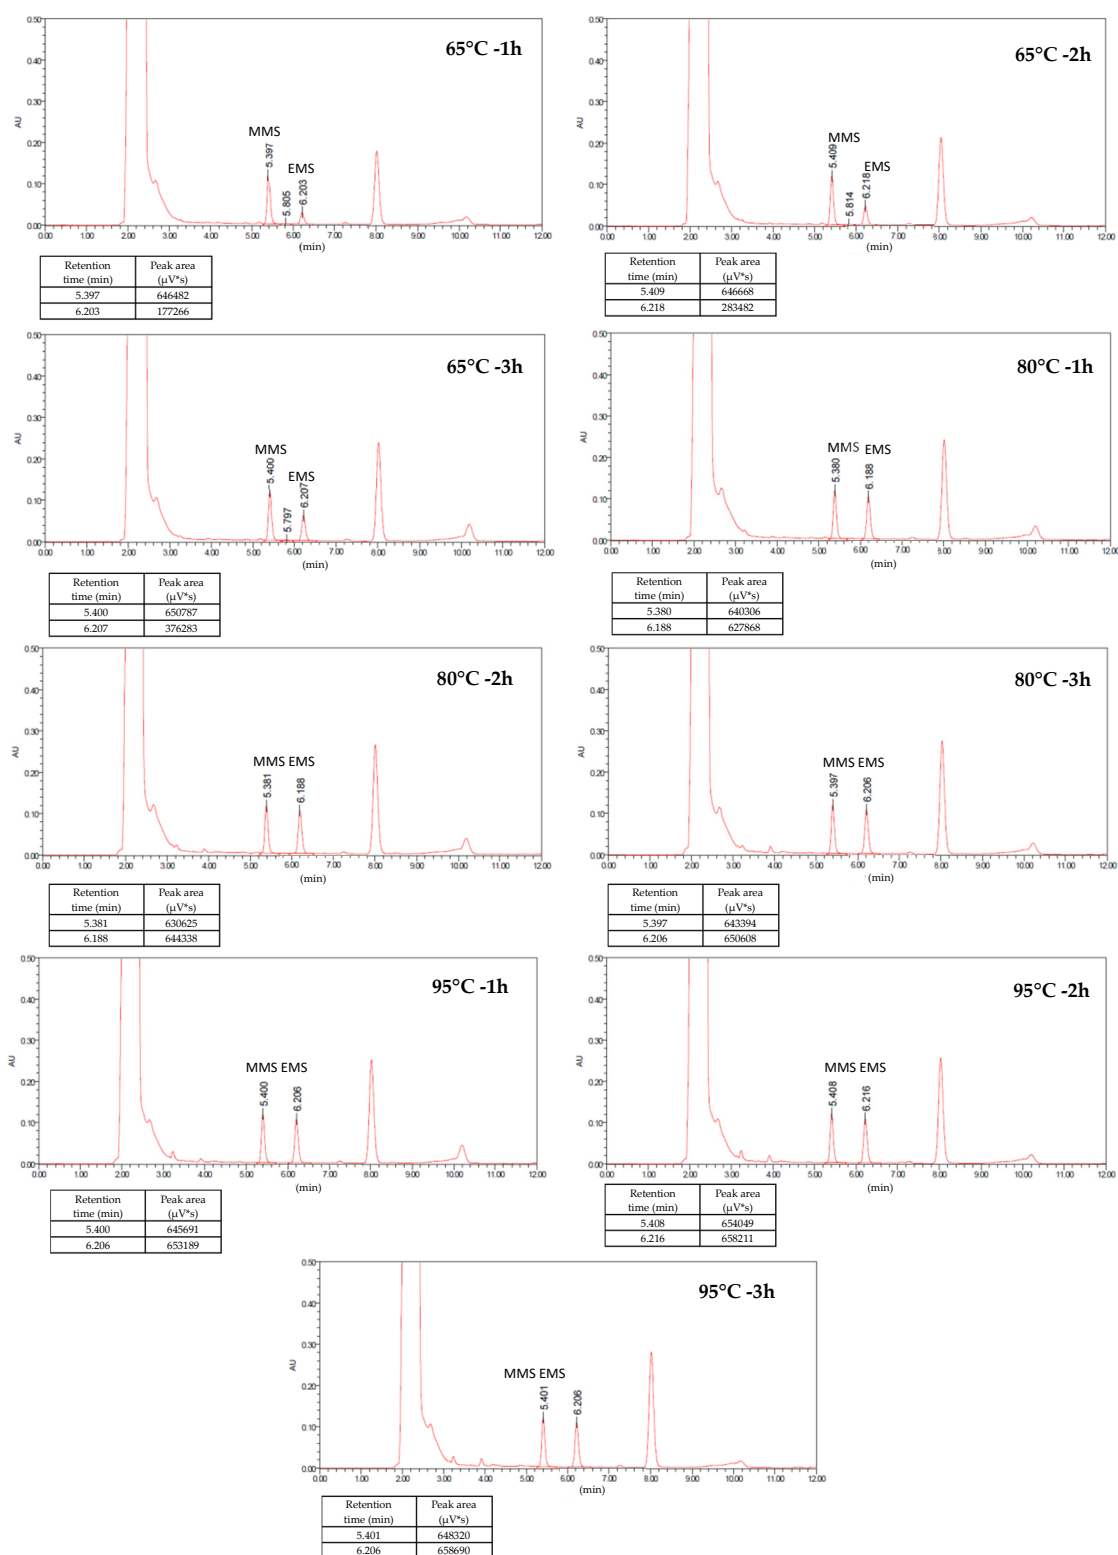

**Figure S2.** HPLC chromatograms of temperatures and times of derivatization reaction.

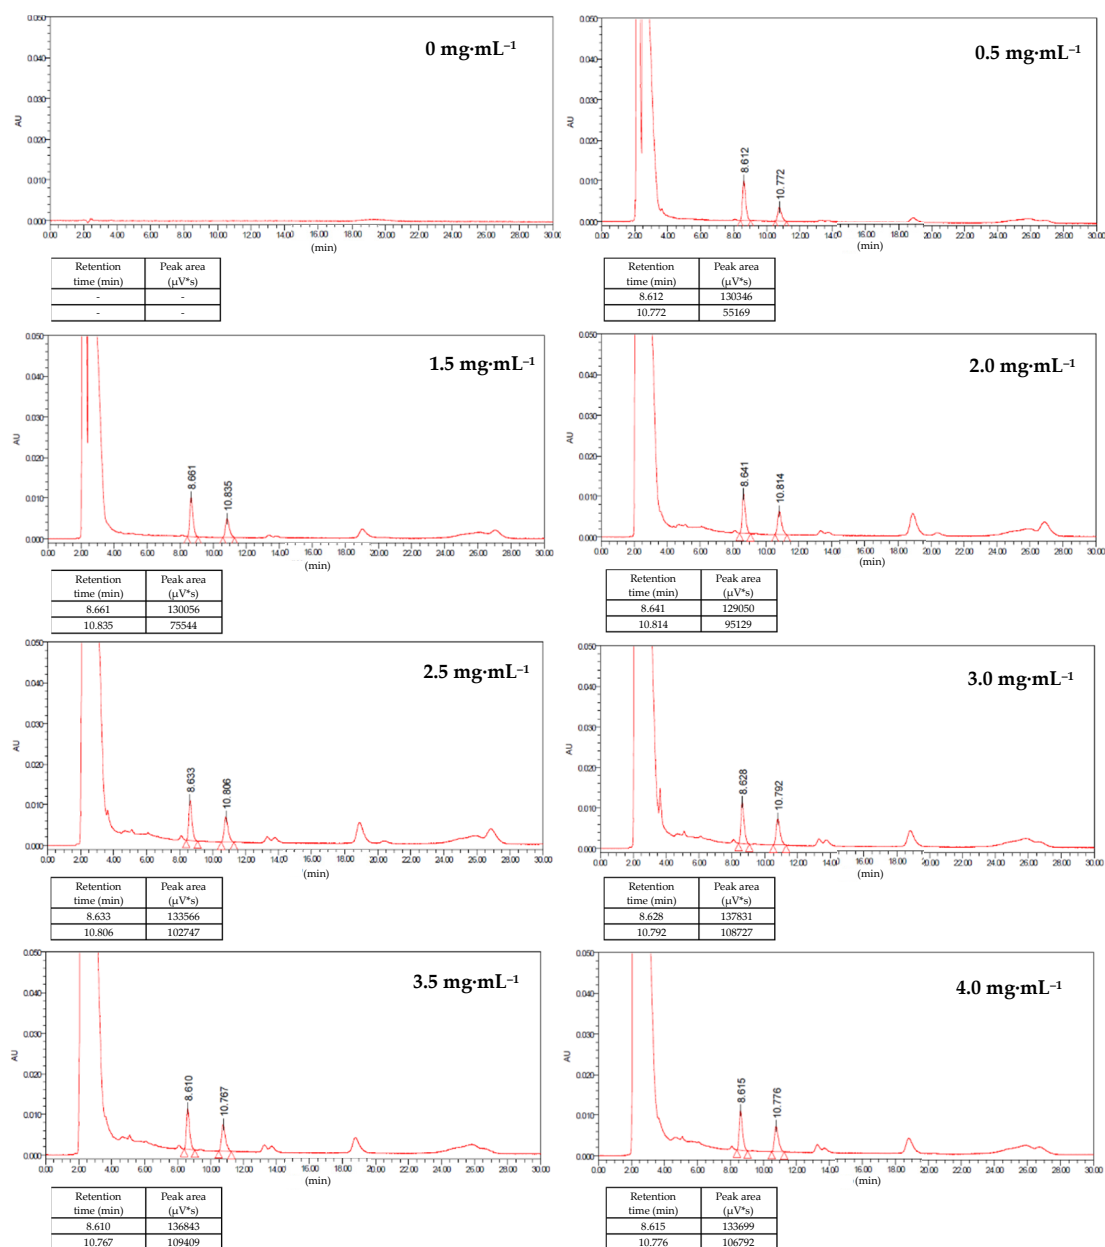

**Figure S3.** HPLC chromatograms of concentrations of derivatization reagent added.

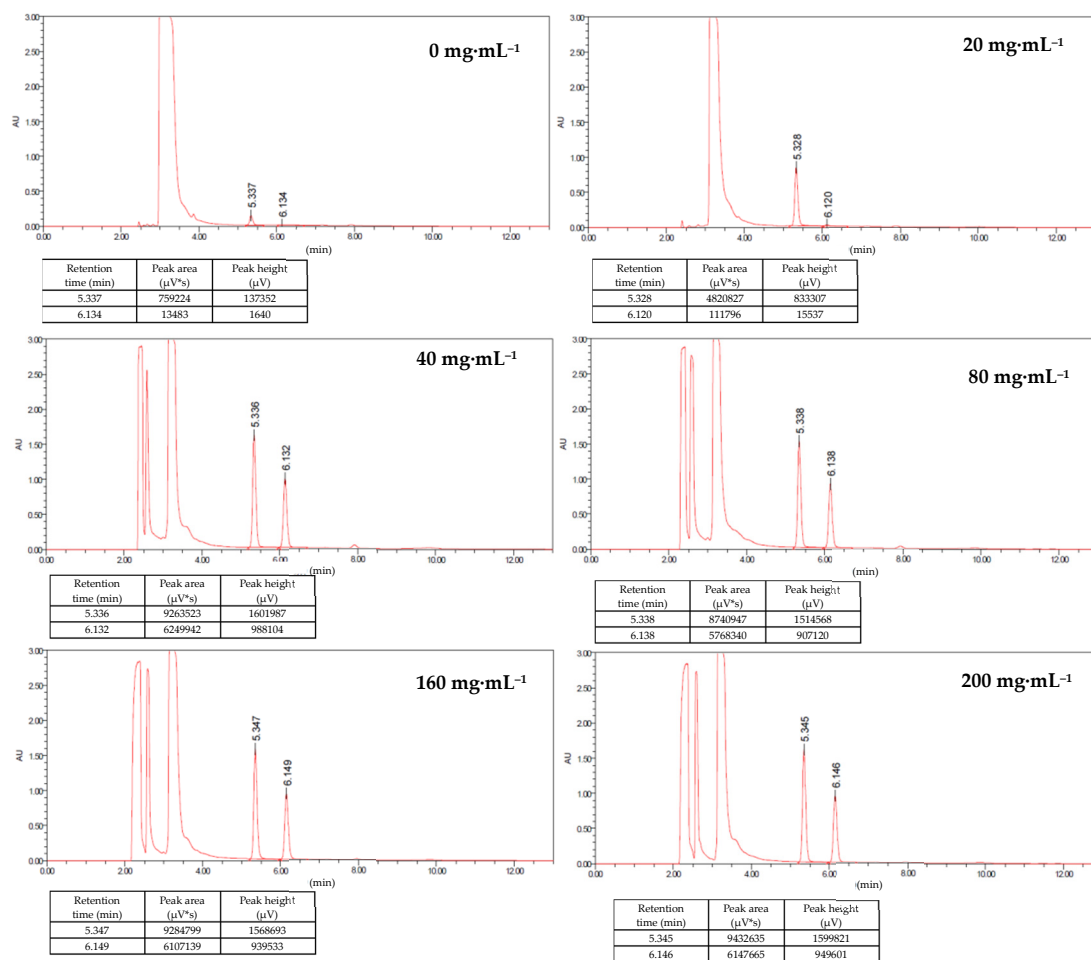

**Figure S4.** HPLC chromatograms of concentrations of NaOH added.

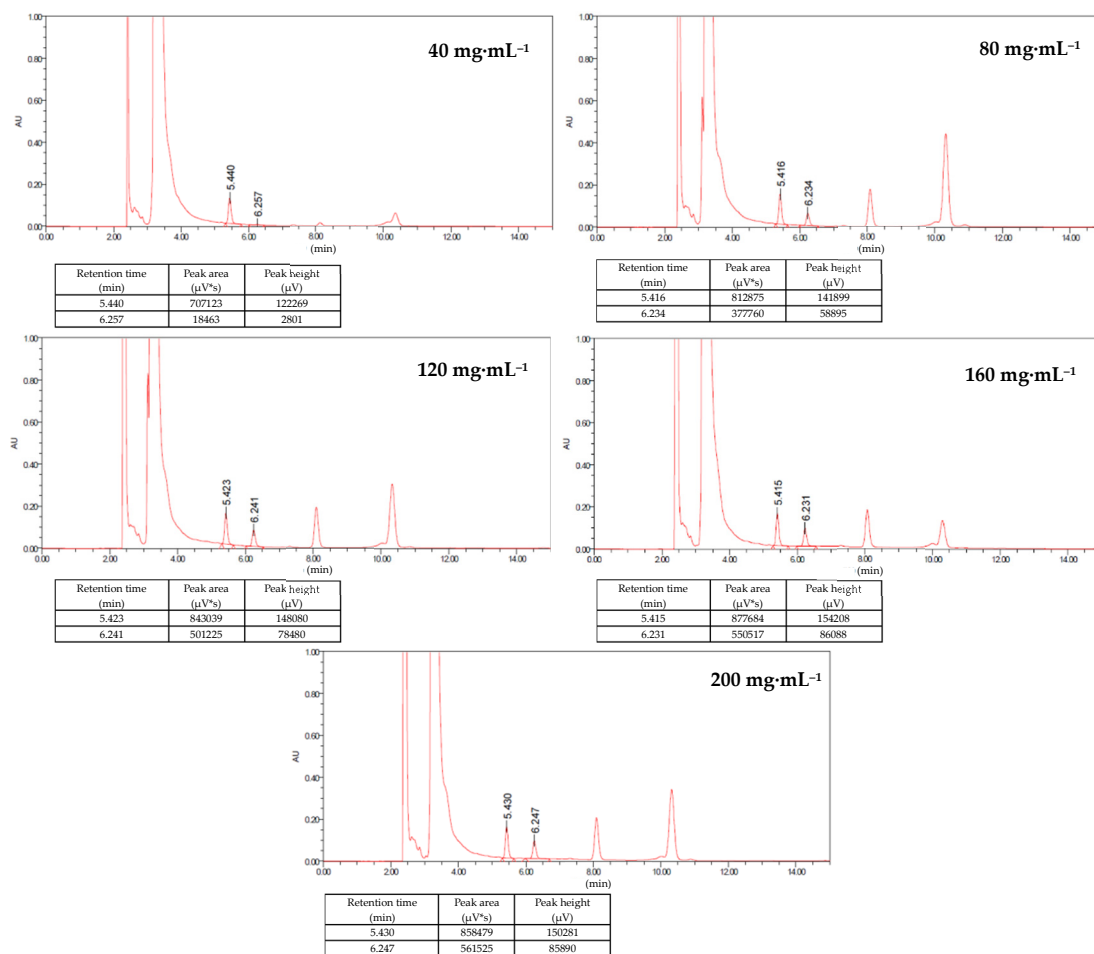

**Figure S5.** HPLC chromatograms of concentrations of Na<sub>2</sub>CO<sub>3</sub> added.

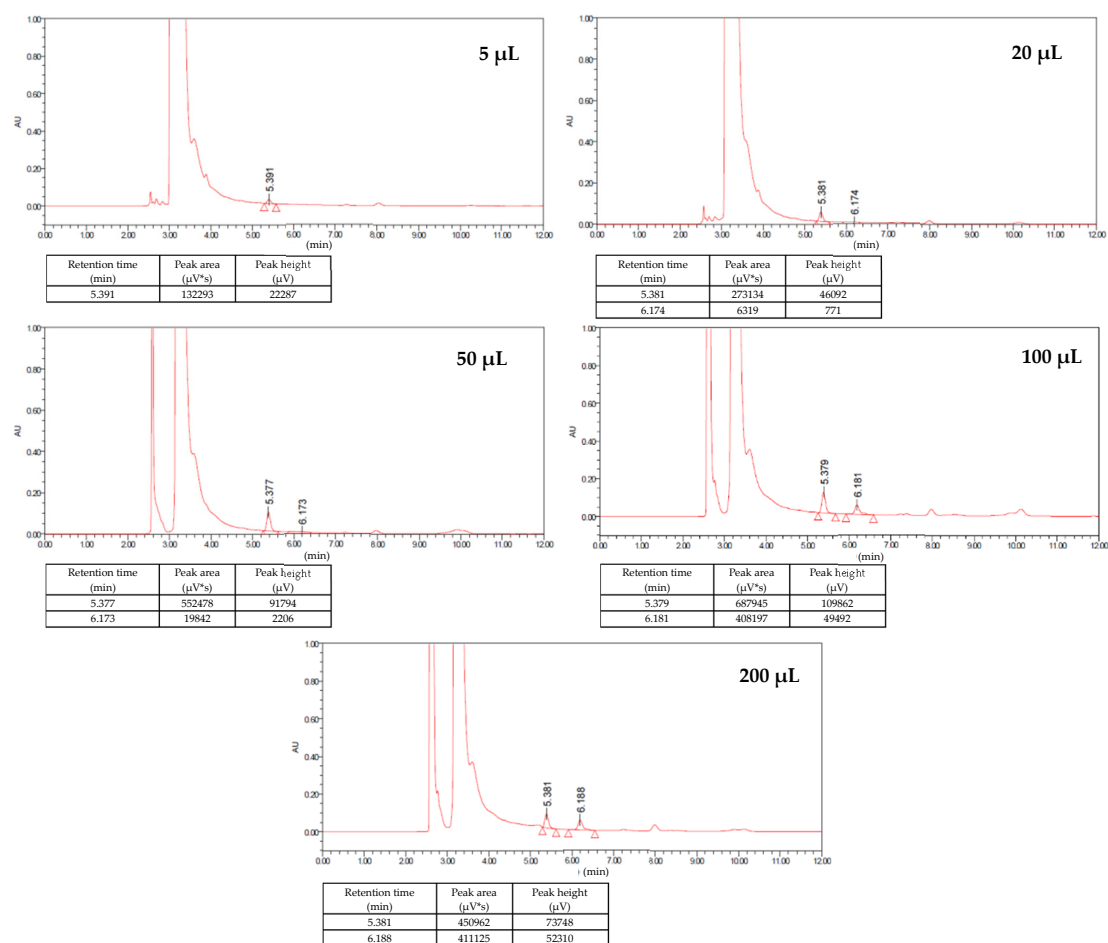

**Figure S6.** HPLC chromatograms of amount of  $\text{Et}_3\text{N}$  added.

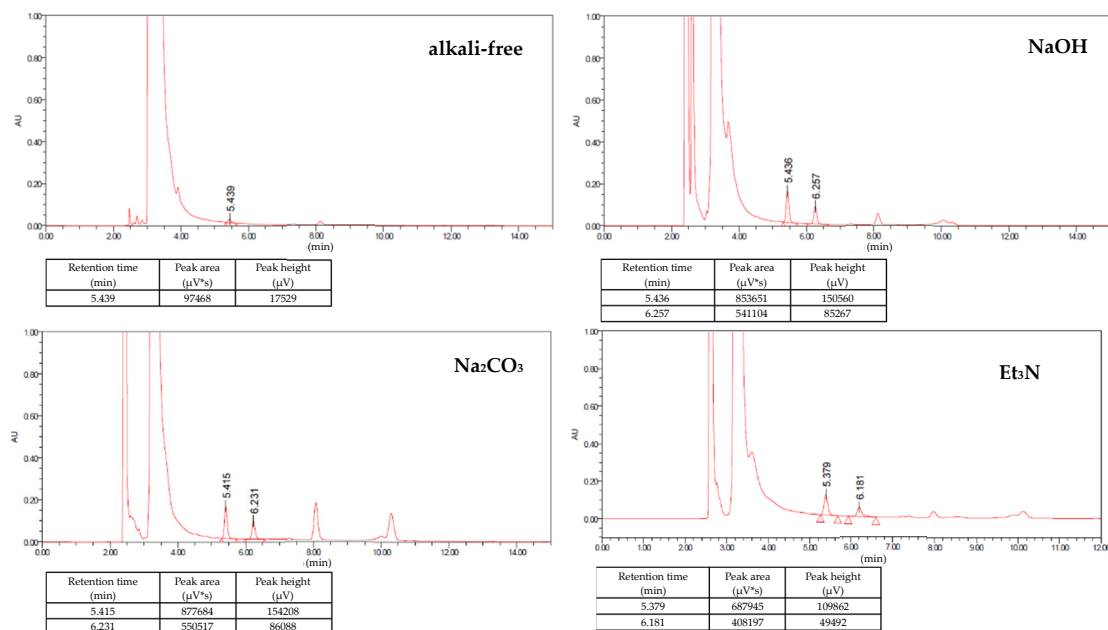

**Figure S7.** HPLC chromatograms of types of base.

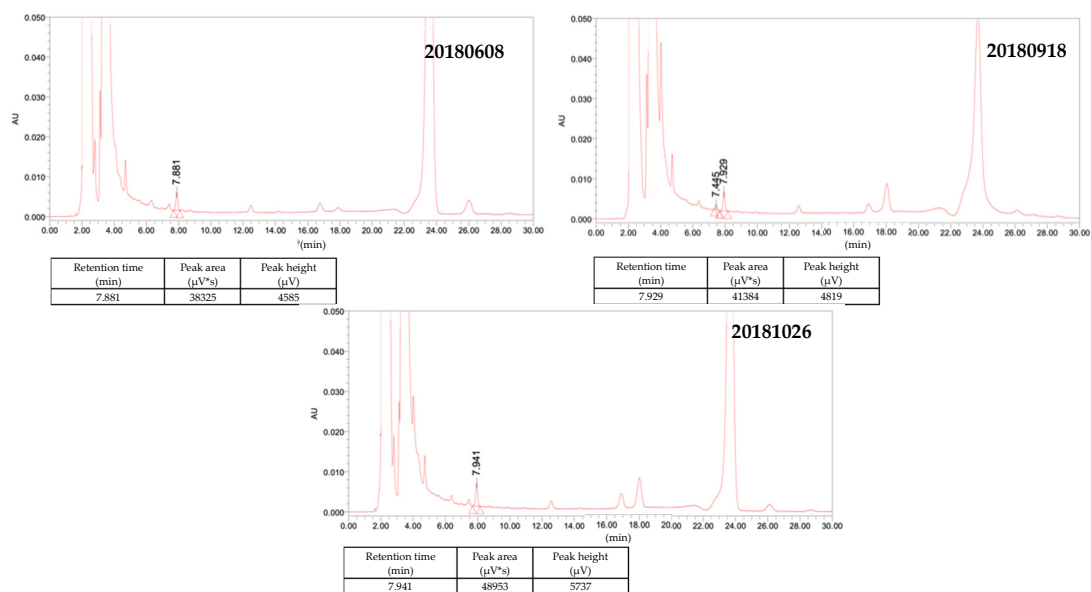

**Figure S8.** HPLC chromatograms of samples.

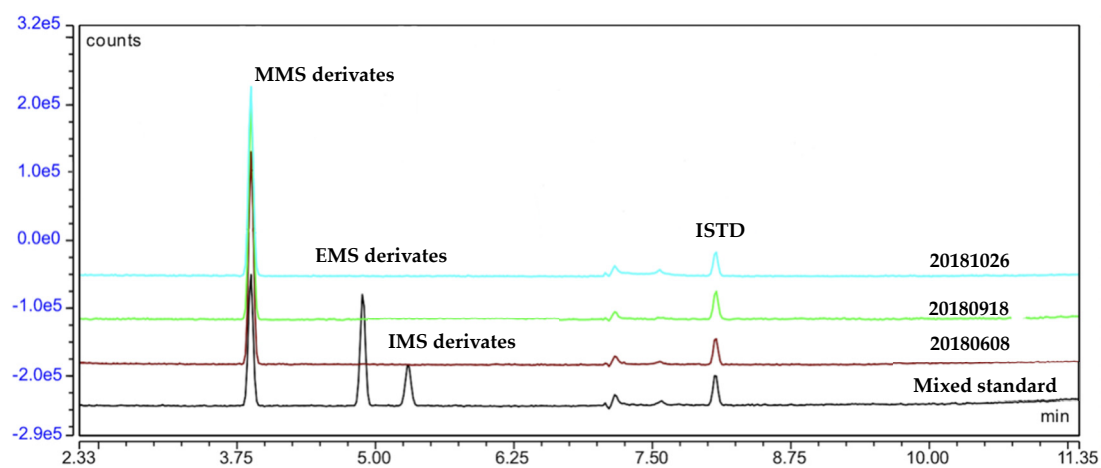

**Figure S9.** GC-MS chromatograms of samples
